# Supplementary material
Source: Elsevier journal article supplement (https://www.sciencedirect.com/science/article/pii/S1888429622000425)
Supplement: mmc1 [file S1888429622000425:mmc1.xlsx]

## Sheet: Ark1
Supplementary Table 1.
The table depicts the 38 filters used in the study. All of them tinted on organic lenses with an index of refraction of 1,5. The filters were mounted on a frame with a handle and with the same filter for both eyes.
The number of participants who chose a specific filter for outdoor or indoor use is noted. 13 participants received an indoor spectacle without filter
Nr.	Company	Filter code	Filter color	Absorption af visual light	#outdoor	#indoor	Spectral light absorption
1	Essilor	314 Brown 75%	Brown	0.26	0	4
2	Essilor	342 Brown 62%	Brown	0.4	1	1
3	Essilor	343 Brown 85%	Brown	0.15	1	0
4	Essilor	344 Brown 95%	Brown	0.04	0	0
5	Essilor	532 Grey Green 62%	Grey green	0.39	0	3
6	Essilor	533 Grey Green 85%	Grey green	0.14	5	2
7	Essilor	534 Grey Green 95%	Grey green	0.06	0	0
8	Essilor	539 Grey Green 75%	Grey green	0.28	0	0
9	Essilor	612 Black 62%	"Black" grey	0.37	0	0
10	Essilor	613 Black 85%	"Black" grey	0.16	0	1
11	Essilor	614 Black 95%	"Black" grey	0.07	0	0
12	Essilor	619 Black 75%	"Black" grey	0.26	0	0
13	Multilens	Grey 10%	Grey	0.91	1	4
14	Multilens	Grey 20%	Grey	0.82	1	1
15	Multilens	Grey 30%	Grey	0.71	1	3
16	Multilens	Grey 50%	Grey	0.51	1	2
17	Multilens	Grey 65%	Grey	0.34	0	4
18	Multilens	Grey 85%	Grey	0.13	0	4
19	Multilens	ML 400	Golden	0.98	0	0
20	Multilens	ML 450	Yellow	0.88	0	0
21	Multilens	ML 500	Yellow	0.77	0	1
22	Multilens	ML 511	Orange	0.57	1	0
23	Multilens	ML 527	Orange	0.45	0	1
24	Multilens	ML 550	Red	0.22	0	0
25	Multilens	ML 585	Red	16	0	0
26	Multilens	ML C1	Yellow	88	0	0
27	Multilens	ML Noir 07 Dark Amber	Yellowish brown	0.02	0	1
28	Multilens	ML Noir 99	Red	0.05	0	0
29	Multilens	Pol 1 Grey	Grey	0.27	0	0
30	Multilens	Pol 3 Grey	Grey	0.84	1	2
31	Multilens	Pol 3 G + 99%	Grey	0.01	0	1
32	Multilens	Pol B + 99%	Brown	0.01	0	1
33	Zeiss	Skylet Fun	Yellowish brown	0.25	0	0
34	Zeiss	Skylet Fun Pol	Yellowish brown	0.19	0	0
35	Zeiss	Skylet Road	Yellowish brown	0.19	0	0
36	Zeiss	Skylet Road Pol	Yellowish brown	0.24	0	0
37	Zeiss	Skylet Sport	Yellowish brown	0.07	0	0
38	Zeiss	Skylet Sport Pol	Yellowish brown	0.11	1	0
